# Supplementary material
Source: Springer Nature journal article supplement (https://www.springermedizin.de/resource/supplementary/12958_2013_1146_MOESM1_ESM.pdf/9566882)

CYP11B2/18S  $\Delta\Delta Ct$

120000  
90000  
60000  
30000  
0

0 0,6 1,2 2,5 5 0 0,6 1,2 2,5 5 0 0,6 1,2 2,5 5

NT

CYP11B2

CYP11B1/B2

Progesterone ( $\mu M$ )

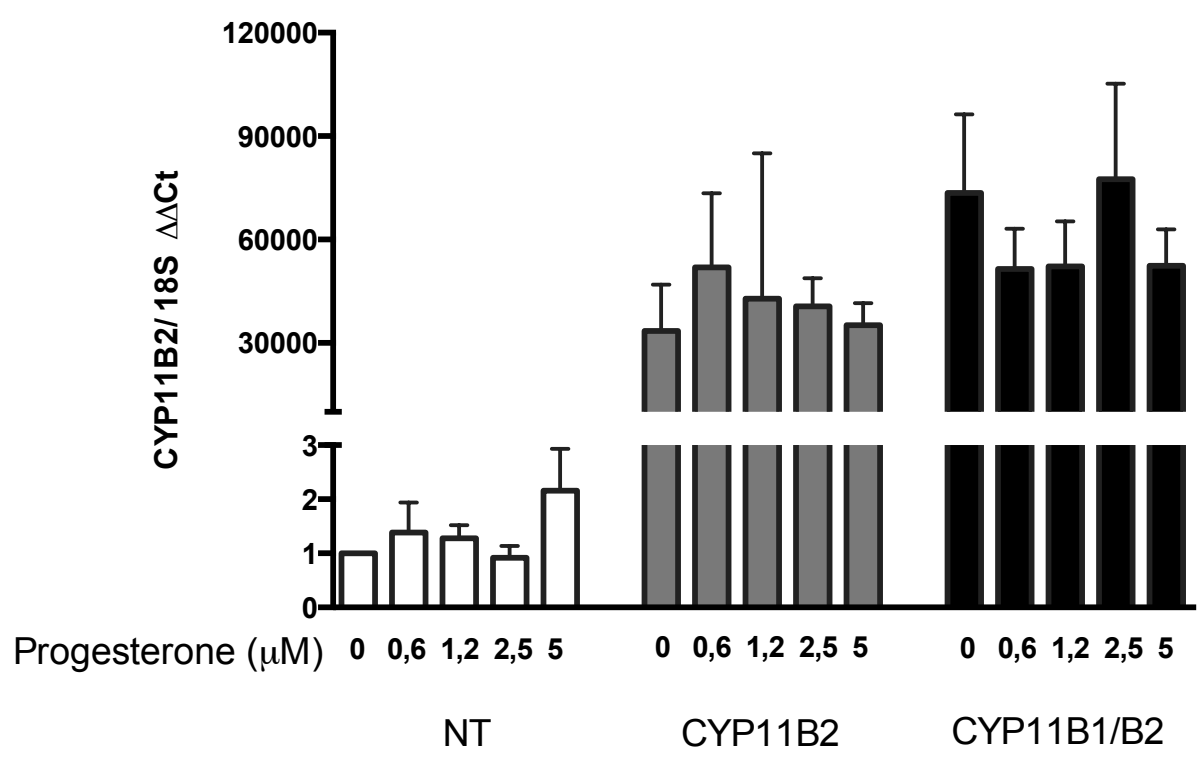

Supplement: MOESM1 [file 9566882]
